# Supplementary material for: Prevalence of Inflammatory Pathways Over Immuno-Tolerance in Peripheral Blood Mononuclear Cells of Recent-Onset Type 1 Diabetes
Source: Front Immunol. 2022 Jan 4;12:765264. doi: 10.3389/fimmu.2021.765264 (PMC8764313; doi:10.3389/fimmu.2021.765264)
Supplement: Supplementary file 2 [file Table_2.xlsx]

## Sheet: Suppl 2S
Supplementary Table 2S: List of differentially expressed probes on PBMCs of patients with type 1 diabetes .
probes	Genes	Odd Ratios	pValue_ttest_corrected_BH	probes #	sequence	general information
A_33_P3220994	A_33_P3220994	1.5197	0.0485896	44127	A_33_P3220994	Unknown
A_33_P3223860	A_33_P3223860	2.47246	0.0138159	53876	A_33_P3223860	Unknown
A_33_P3233000	A_33_P3233000	1.64314	0.0311114	47897	A_33_P3233000	Unknown
A_33_P3241596	A_33_P3241596	1.69637	0.0205689	62263	A_33_P3241596	Unknown
A_33_P3276062	A_33_P3276062	2.08864	0.0205076	9044	A_33_P3276062	Unknown
A_33_P3279181	A_33_P3279181	1.79625	0.0138538	6520	A_33_P3279181	Unknown
A_33_P3281478	A_33_P3281478	1.51789	0.0360493	45878	A_33_P3281478	Unknown
A_33_P3295932	A_33_P3295932	1.9201	0.0169099	13588	A_33_P3295932	Unknown
A_33_P3334121	A_33_P3334121	1.87775	0.0245627	1457	A_33_P3334121	Unknown
A_33_P3347049	A_33_P3347049	1.57721	0.0194449	49205	A_33_P3347049	Unknown
A_33_P3383009	A_33_P3383009	3.31109	0.0415699	45575	A_33_P3383009	Unknown
A_33_P3396379	A_33_P3396379	2.3343	0.0428242	53057	A_33_P3396379	Unknown
A_33_P3402495	A_33_P3402495	1.55507	0.0166722	55365	A_33_P3402495	Unknown
A_33_P3280950	A2M-AS1	1.54616	0.0370607	24314	NR_026971	ref|Homo sapiens A2M antisense RNA 1 (head to head) (A2M-AS1)
A_24_P356	AAK1	1.94295	0.0169577	48440	ENST00000406297	ens|AP2 associated kinase 1 [Source:HGNC Symbol;Acc:HGNC:19679] [ENST00000406297]
A_33_P3309054	AB209400	1.81803	0.0225462	50435	AB209400	gb|Homo sapiens mRNA for basic FGF-repressed Zic binding protein isoform a variant protein. [AB209400]
A_33_P3307957	ABCD3	-2.18547	0.037171	60456	NM_001122674	ref|Homo sapiens ATP-binding cassette
A_33_P3307955	ABCD3	-2.25831	0.022173	55645	NM_001122674	ref|Homo sapiens ATP-binding cassette
A_24_P282416	ABL1	-1.95003	0.0320728	17399	NM_007313	ref|Homo sapiens ABL proto-oncogene 1
A_23_P131676	ACKR3	1.57036	0.0469638	44951	NM_020311	ref|Homo sapiens atypical chemokine receptor 3 (ACKR3)
A_23_P70359	AGPAT4-IT1	1.57716	0.0195332	57724	NR_024277	ref|Homo sapiens AGPAT4 intronic transcript 1 (non-protein coding) (AGPAT4-IT1)
A_23_P21363	AHNAK	-1.52961	0.0302119	48080	NM_024060	ref|Homo sapiens AHNAK nucleoprotein (AHNAK)
A_32_P44394	AIM2	1.55134	0.0315018	62147	NM_004833	ref|Homo sapiens absent in melanoma 2 (AIM2)
A_23_P359870	AJ312026	2.96183	0.00677362	50282	AJ312026	gb|Homo sapiens mRNA for hypothetical protein (C8ORF16). [AJ312026]
A_21_P0014686	AK023887	2.20939	0.0194449	52432	AK023887	gb|Homo sapiens cDNA FLJ13825 fis
A_21_P0014584	AK094623	1.54679	0.0164093	21114	AK094623	gb|Homo sapiens cDNA FLJ37304 fis
A_33_P3283201	AK128779	2.12734	0.0161368	45757	AK128779	gb|Homo sapiens cDNA FLJ45443 fis
A_33_P3266993	AK130024	1.55616	0.0420278	1507	AK130024	gb|Homo sapiens cDNA FLJ26514 fis
A_33_P3232493	AK130794	1.70647	0.0313982	23151	AK130794	gb|Homo sapiens cDNA FLJ27284 fis
A_33_P3350580	AK131548	1.85684	0.0430642	9588	AK131548	gb|Homo sapiens cDNA FLJ16784 fis
A_24_P151834	ANKFY1	2.27478	0.00953741	7393	ENST00000570934	ens|ankyrin repeat and FYVE domain containing 1 [Source:HGNC Symbol;Acc:HGNC:20763] [ENST00000570934]
A_33_P3261595	ANKRD34B	2.19232	0.0258501	20265	NM_001004441	ref|Homo sapiens ankyrin repeat domain 34B (ANKRD34B)
A_23_P14649	ANP32A-IT1	1.56916	0.0164089	62435	NR_026808	ref|Homo sapiens ANP32A intronic transcript 1 (non-protein coding) (ANP32A-IT1)
A_23_P79591	APOB	-1.97148	0.0460712	35801	NM_000384	ref|Homo sapiens apolipoprotein B (APOB)
A_33_P3419190	AREG	-5.68377	0.049157	5251	NM_001657	ref|Homo sapiens amphiregulin (AREG)
A_23_P146325	ASAP1-IT1	2.9178	0.00515042	48725	NR_002765	ref|Homo sapiens ASAP1 intronic transcript 1 (non-protein coding) (ASAP1-IT1)
A_23_P52017	ASPM	2.08879	0.0225462	29573	NM_018136	ref|Homo sapiens asp (abnormal spindle) homolog
A_19_P00809417	ATF7IP2	-1.56393	0.0169577	50071	ENST00000570163	ens|activating transcription factor 7 interacting protein 2 [Source:HGNC Symbol;Acc:HGNC:20397] [ENST00000570163]
A_33_P3218410	ATM	1.9246	0.0252081	61971	BC007023	gb|Homo sapiens ataxia telangiectasia mutated (includes complementation groups A
A_33_P3256500	ATXN2	2.20033	0.0393298	27134	ENST00000392645	ens|ataxin 2 [Source:HGNC Symbol;Acc:HGNC:10555] [ENST00000392645]
A_24_P419087	AVIL	2.18491	0.0233048	15822	NM_006576	ref|Homo sapiens advillin (AVIL)
A_33_P3225610	AY358225	1.57321	0.0232817	62384	AY358225	gb|Homo sapiens clone DNA86575 GRTR3118 (UNQ3118) mRNA
A_21_P0013975	AY358662	1.50481	0.0468997	53223	AY358662	gb|Homo sapiens clone DNA57695 GVEI466 (UNQ466) mRNA
A_24_P79855	BC104430	1.97253	0.0304137	16625	BC104430	gb|Homo sapiens hypothetical LOC54744
A_33_P3365878	BMP8B	1.53955	0.0307739	61747	NM_001720	ref|Homo sapiens bone morphogenetic protein 8b (BMP8B)
A_33_P3400708	BNIPL	1.52648	0.0346474	26628	NM_001159642	ref|Homo sapiens BCL2/adenovirus E1B 19kD interacting protein like (BNIPL)
A_33_P3322082	BQ934349	1.87272	0.0243431	60112	BQ934349	gb|AGENCOURT_8818087 NIH_MGC_18 Homo sapiens cDNA clone IMAGE:6422031 5'
A_33_P3313660	BRD7P3	1.5753	0.036248	43696	NR_002730	ref|Homo sapiens bromodomain containing 7 pseudogene 3 (BRD7P3)
A_24_P152404	C10orf76	-1.81761	0.030204	41856	ENST00000311122	ens|chromosome 10 open reading frame 76 [Source:HGNC Symbol;Acc:HGNC:25788] [ENST00000311122]
A_23_P398491	C15orf57	1.70616	0.020375	30029	NM_001289132	ref|Homo sapiens chromosome 15 open reading frame 57 (C15orf57)
A_33_P3308585	C1RL-AS1	1.86685	0.0175693	22738	NR_026947	ref|Homo sapiens C1RL antisense RNA 1 (C1RL-AS1)
A_22_P00004216	C1RL-AS1	1.65959	0.00976009	53574	NR_026947	ref|Homo sapiens C1RL antisense RNA 1 (C1RL-AS1)
A_24_P927325	C2CD3	-1.97244	0.0459153	16569	NM_015531	ref|Homo sapiens C2 calcium-dependent domain containing 3 (C2CD3)
A_33_P3388983	C5orf56	1.87998	0.00515042	59333	AK025221	gb|Homo sapiens cDNA: FLJ21568 fis
A_24_P941866	C5orf56	1.66369	0.039712	22750	AK096941	gb|Homo sapiens cDNA FLJ39622 fis
A_24_P683011	C8orf88	-1.67413	0.0248495	8365	NM_001190972	ref|Homo sapiens chromosome 8 open reading frame 88 (C8orf88)
A_23_P422115	C9orf116	-1.7442	0.0391144	36668	NM_001048265	ref|Homo sapiens chromosome 9 open reading frame 116 (C9orf116)
A_24_P401870	C9orf139	1.91086	0.0120534	1172	NM_207511	ref|Homo sapiens chromosome 9 open reading frame 139 (C9orf139)
A_23_P146367	C9orf89	-1.50883	0.0343411	51633	NM_032310	ref|Homo sapiens chromosome 9 open reading frame 89 (C9orf89)
A_33_P3316068	CA5B	-1.79	0.0225549	22079	ENST00000380313	ens|carbonic anhydrase VB
A_23_P41854	CARD6	1.53121	0.0245857	14220	NM_032587	ref|Homo sapiens caspase recruitment domain family
A_19_P00809119	CASC15	-1.94985	0.0259637	21865	NR_015410	ref|Homo sapiens cancer susceptibility candidate 15 (non-protein coding) (CASC15)
A_23_P91283	CASS4	-2.0415	0.00979677	30355	NM_020356	ref|Homo sapiens Cas scaffolding protein family member 4 (CASS4)
A_33_P3265956	CBFA2T2	1.62431	0.00953741	11944	JF432662	gb|Synthetic construct Homo sapiens clone IMAGE:100073900 core-binding factor
A_33_P3606465	CBX3P2	-1.62068	0.0137624	61193	NR_033754	ref|Homo sapiens chromobox homolog 3 pseudogene 2 (CBX3P2)
A_23_P202837	CCND1	1.76822	0.0410783	16118	NM_053056	ref|Homo sapiens cyclin D1 (CCND1)
A_23_P257815	CD180	1.85715	0.0372933	39054	NM_005582	ref|Homo sapiens CD180 molecule (CD180)
A_33_P3419545	CDADC1	-1.73455	0.0128324	13049	NM_001193478	ref|Homo sapiens cytidine and dCMP deaminase domain containing 1 (CDADC1)
A_23_P300056	CDC42	-1.77336	0.0407737	32326	NM_044472	ref|Homo sapiens cell division cycle 42 (CDC42)
A_23_P253524	CENPE	1.8696	0.0163748	52871	NM_001813	ref|Homo sapiens centromere protein E
A_23_P253524	CENPE	1.85603	0.0175693	49666	NM_001813	ref|Homo sapiens centromere protein E
A_23_P253524	CENPE	1.82822	0.0106362	7000	NM_001813	ref|Homo sapiens centromere protein E
A_23_P253524	CENPE	1.79561	0.0405895	41647	NM_001813	ref|Homo sapiens centromere protein E
A_23_P253524	CENPE	1.78609	0.0181752	56226	NM_001813	ref|Homo sapiens centromere protein E
A_23_P253524	CENPE	1.76434	0.00953741	4416	NM_001813	ref|Homo sapiens centromere protein E
A_23_P253524	CENPE	1.73973	0.0181205	11601	NM_001813	ref|Homo sapiens centromere protein E
A_22_P00023828	CES3	1.60894	0.0341795	2480	NM_001185177	ref|Homo sapiens carboxylesterase 3 (CES3)
A_23_P62642	CFAP45	-2.81181	0.0145705	14912	NM_012337	ref|Homo sapiens cilia and flagella associated protein 45 (CFAP45)
A_23_P139919	CHST11	-1.57607	0.0274627	56826	NM_018413	ref|Homo sapiens carbohydrate (chondroitin 4) sulfotransferase 11 (CHST11)
A_23_P142322	CIRBP	-1.53984	0.0194449	47308	NM_001280	ref|Homo sapiens cold inducible RNA binding protein (CIRBP)
A_33_P3213374	CITED2	-1.52112	0.0137624	29050	NM_006079	ref|Homo sapiens Cbp/p300-interacting transactivator
A_23_P311895	CLIC5	1.69842	0.0303486	4715	NM_016929	ref|Homo sapiens chloride intracellular channel 5 (CLIC5)
A_33_P3424462	CNST	-2.23153	0.0181191	665	NM_001139459	ref|Homo sapiens consortin
A_33_P3257568	CNTRL	1.51847	0.0157631	24102	ENST00000373851	ens|centriolin [Source:HGNC Symbol;Acc:HGNC:1858] [ENST00000373851]
A_33_P3289113	COX11	1.76673	0.037818	32616	ENST00000572088	ens|cytochrome c oxidase assembly homolog 11 (yeast) [Source:HGNC Symbol;Acc:HGNC:2261] [ENST00000572088]
A_23_P140384	CTSG	4.91409	0.0287376	33232	NM_001911	ref|Homo sapiens cathepsin G (CTSG)
A_33_P3330264	CXCL1	-1.72161	0.039712	35682	NM_001511	ref|Homo sapiens chemokine (C-X-C motif) ligand 1 (melanoma growth stimulating activity
A_24_P74559	CYTH4	1.52453	0.0163748	34005	NM_013385	ref|Homo sapiens cytohesin 4 (CYTH4)
A_23_P104318	DDIT4	-2.30874	0.0425115	29109	NM_019058	ref|Homo sapiens DNA-damage-inducible transcript 4 (DDIT4)
A_23_P104318	DDIT4	-2.33181	0.0427158	27477	NM_019058	ref|Homo sapiens DNA-damage-inducible transcript 4 (DDIT4)
A_23_P104318	DDIT4	-2.34433	0.0369237	27124	NM_019058	ref|Homo sapiens DNA-damage-inducible transcript 4 (DDIT4)
A_23_P104318	DDIT4	-2.34786	0.0380291	13805	NM_019058	ref|Homo sapiens DNA-damage-inducible transcript 4 (DDIT4)
A_23_P104318	DDIT4	-2.35035	0.037818	51960	NM_019058	ref|Homo sapiens DNA-damage-inducible transcript 4 (DDIT4)
A_23_P104318	DDIT4	-2.37846	0.0336881	8600	NM_019058	ref|Homo sapiens DNA-damage-inducible transcript 4 (DDIT4)
A_23_P104318	DDIT4	-2.38362	0.037818	15332	NM_019058	ref|Homo sapiens DNA-damage-inducible transcript 4 (DDIT4)
A_23_P104318	DDIT4	-2.39237	0.0356546	13567	NM_019058	ref|Homo sapiens DNA-damage-inducible transcript 4 (DDIT4)
A_23_P104318	DDIT4	-2.40822	0.0313982	35874	NM_019058	ref|Homo sapiens DNA-damage-inducible transcript 4 (DDIT4)
A_23_P104318	DDIT4	-2.4121	0.0360493	56404	NM_019058	ref|Homo sapiens DNA-damage-inducible transcript 4 (DDIT4)
A_33_P3418170	DDX58	1.6382	0.0271965	14056	NM_014314	ref|Homo sapiens DEAD (Asp-Glu-Ala-Asp) box polypeptide 58 (DDX58)
A_23_P31816	DEFA3	5.70445	0.0397378	17173	NM_005217	ref|Homo sapiens defensin
A_23_P326080	DEFA4	7.78614	0.030204	23379	NM_001925	ref|Homo sapiens defensin
A_24_P376129	DFNB31= WHRN	-3.97255	0.0297991	44145	ENST00000374057	ens|deafness
A_33_P3303602	DGKZ	1.67187	0.0161368	12751	ENST00000527674	ens|diacylglycerol kinase
A_23_P321501	DHRS2	1.54693	0.0462101	1840	NM_182908	ref|Homo sapiens dehydrogenase/reductase (SDR family) member 2 (DHRS2)
A_21_P0000052	DISC1	2.1474	0.0222676	23116	NM_001164554	ref|Homo sapiens disrupted in schizophrenia 1 (DISC1)
A_33_P3464855	DKFZP586B0319	1.85408	0.0450094	29619	AL050097	gb|Homo sapiens mRNA; cDNA DKFZp586B0319 (from clone DKFZp586B0319) [AL050097]
A_21_P0007916	DNAJC3-AS1	1.50862	0.0362438	23209	ENST00000499499	ens|DNAJC3 antisense RNA 1 (head to head) [Source:HGNC Symbol;Acc:HGNC:39808] [ENST00000499499]
A_33_P3285430	DNM1L	1.55258	0.0485896	58404	ENST00000547640	ens|dynamin 1-like [Source:HGNC Symbol;Acc:HGNC:2973] [ENST00000547640]
A_23_P252740	DSCC1	2.36014	0.0460547	47977	NM_024094	ref|Homo sapiens DNA replication and sister chromatid cohesion 1 (DSCC1)
A_23_P10385	DTL	2.18916	0.021599	45746	NM_016448	ref|Homo sapiens denticleless E3 ubiquitin protein ligase homolog (Drosophila) (DTL)
A_23_P10385	DTL	1.90408	0.0391144	13978	NM_016448	ref|Homo sapiens denticleless E3 ubiquitin protein ligase homolog (Drosophila) (DTL)
A_23_P54991	DYNLL2	-1.69656	0.0249674	42297	NM_080677	ref|Homo sapiens dynein
A_33_P3345608	EDRF1	-2.00333	0.0343153	19466	NM_001202438	ref|Homo sapiens erythroid differentiation regulatory factor 1 (EDRF1)
A_22_P00009040	ENST00000412797	-1.77387	0.0297664	51982	ENST00000412797	ref|PREDICTED: Homo sapiens low density lipoprotein receptor adaptor protein 1 (LDLRAP1)
A_22_P00000174	ENST00000413103	2.50096	0.0476162	55787	ENST00000413103	gb|PREDICTED: Homo sapiens uncharacterized LOC100505940 (LOC100505940)
A_22_P00004336	ENST00000414418	1.53592	0.0397378	49295	ENST00000414418	gb|BX106804 Soares_testis_NHT Homo sapiens cDNA clone IMAGp998B091794
A_21_P0005225	ENST00000415356	-2.5487	0.0137624	19579	ENST00000415356	gb|Homo sapiens cDNA clone IMAGE:4838353. [BC031962]
A_22_P00022299	ENST00000416861	-1.89368	0.0384334	31960	ENST00000416861	tc|Q8WXS3_HUMAN (Q8WXS3) BAALC 1-5-6-8
A_21_P0007934	ENST00000426509	2.09556	0.037934	46339	ENST00000426509	ens|long intergenic non-protein coding RNA 407 [Source:HGNC Symbol;Acc:HGNC:42739] [ENST00000426509]
A_21_P0012080	ENST00000437561	1.8364	0.0366972	11247	ENST00000437561	ens|long intergenic non-protein coding RNA 152 [Source:HGNC Symbol;Acc:HGNC:28717] [ENST00000437561]
A_21_P0001923	ENST00000450667	-1.94979	0.037834	24903	ENST00000450667	Unknown
A_22_P00010085	ENST00000450750	-1.72464	0.0352097	36873	ENST00000450750	gb|962532R1 BRSTTUT03 Homo sapiens cDNA clone 962532 5'
A_22_P00009237	ENST00000451149	2.10344	0.0321913	55675	ENST00000451149	Unknown
A_33_P3409274	ENST00000454421	3.78392	0.021994	2259	ENST00000454421	ens|immunoglobulin heavy variable 3-64 [Source:HGNC Symbol;Acc:HGNC:5617] [ENST00000454421]
A_22_P00004825	ENST00000455931	-1.84405	0.0129489	23703	ENST00000455931	Unknown
A_22_P00000676	ENST00000458030	-1.72582	0.00953741	45697	ENST00000458030	ens|acylphosphatase 2
A_22_P00017645	ENST00000469806	-2.10852	0.0178448	38435	ENST00000469806	Unknown
A_33_P3604069	ENST00000469997	2.59351	0.00235421	52989	ENST00000469997	ens|ribosomal protein S2 pseudogene 45 [Source:HGNC Symbol;Acc:HGNC:25709] [ENST00000469997]
A_21_P0002758	ENST00000471614	-2.63648	0.0488941	32244	ENST00000471614	gb|cl111b05.z1 Hembase; Erythroid Precursor Cells (LCB:cl library) Homo sapiens cDNA clone cl111b05 5'
A_22_P00007667	ENST00000502101	-1.7997	0.029756	5622	ENST00000502101	Unknown
A_21_P0012391	ENST00000504808	1.58776	0.042117	13796	ENST00000504808	ref|PREDICTED: Homo sapiens uncharacterized LOC101927056 (RP11-379B18.5)
A_24_P84970	ENST00000505048	1.80947	0.0145705	52011	ENST00000505048	ens|keratin 18 pseudogene 42 [Source:HGNC Symbol;Acc:HGNC:33412] [ENST00000505048]
A_21_P0004064	ENST00000506592	-3.18102	0.0486989	38508	ENST00000506592	Unknown
A_21_P0012708	ENST00000508156	1.70339	0.00905092	17648	ENST00000508156	Unknown
A_22_P00004088	ENST00000509470	-1.63795	0.0456521	33985	ENST00000509470	Unknown
A_21_P0004108	ENST00000512978	1.75519	0.0287376	45467	ENST00000512978	Unknown
A_19_P00317872	ENST00000521122	-1.49552	0.039712	5787	ENST00000521122	ens|Pvt1 oncogene (non-protein coding) [Source:HGNC Symbol;Acc:HGNC:9709] [ENST00000521122]
A_33_P3248227	ENST00000523328	-1.50831	0.0127369	46973	ENST00000523328	ens|Pvt1 oncogene (non-protein coding) [Source:HGNC Symbol;Acc:HGNC:9709] [ENST00000523328]
A_22_P00005952	ENST00000526041	-1.50868	0.0356546	44087	ENST00000526041	gb|HUM139E05B Human fetal brain (TFujiwara) Homo sapiens cDNA clone GEN-139E05 5'
A_22_P00007058	ENST00000532652	-1.65777	0.0102428	35519	ENST00000532652	gb|BX091362 Soares_fetal_heart_NbHH19W Homo sapiens cDNA clone IMAGp998E144302 ; IMAGE:1694197
A_33_P3413732	ENST00000535190	1.60091	0.0488805	30015	ENST00000535190	ens|nuclear pore complex interacting protein family
A_22_P00015727	ENST00000542121	-2.31077	0.0386088	36933	ENST00000542121	gb|603046254F1 NIH_MGC_116 Homo sapiens cDNA clone IMAGE:5186460 5'
A_22_P00023219	ENST00000543604	1.58758	0.0241251	35467	ENST00000543604	gb|PREDICTED: Homo sapiens uncharacterized LOC100996472 (LOC100996472)
A_33_P3281250	ENST00000547918	1.62807	0.0252081	44758	ENST00000547918	ens|T cell receptor beta variable 7-1 (non-functional) [Source:HGNC Symbol;Acc:HGNC:12235] [ENST00000547918]
A_22_P00000355	ENST00000554412	-1.75028	0.0459467	35555	ENST00000554412	tc|NM_075999 F48B9.7 {Caenorhabditis elegans} (exp=-1; wgp=0; cg=0)
A_21_P0007229	ENST00000561588	-1.54138	0.0459467	29663	ENST00000561588	ref|PREDICTED: Homo sapiens uncharacterized LOC101928262 (LOC101928262)
A_21_P0008876	ENST00000562180	2.09613	0.0321913	46193	ENST00000562180	Unknown
A_32_P139738	ENST00000563904	2.00576	0.00976009	23160	ENST00000563904	ens|hect domain and RLD 2 pseudogene 4 [Source:HGNC Symbol;Acc:HGNC:4872] [ENST00000563904]
A_22_P00000872	ENST00000565929	2.27626	0.0106362	50226	ENST00000565929	tc|Q47K95_THEFY (Q47K95) Single-strand binding protein
A_22_P00020347	ENST00000566922	1.71175	0.033125	7148	ENST00000566922	Unknown
A_21_P0009157	ENST00000566971	2.03596	0.0195332	54678	ENST00000566971	Unknown
A_22_P00003312	ENST00000576365	-1.67452	0.0265593	14269	ENST00000576365	ref|PREDICTED: Homo sapiens lysophosphatidylcholine acyltransferase 2 (LPCAT2)
A_33_P3233437	ENST00000578241	1.95411	0.0337003	44872	ENST00000578241	Unknown
A_24_P366777	ENST00000579793	1.59456	0.0145705	39546	ENST00000579793	ens|notch 2 N-terminal like [Source:HGNC Symbol;Acc:HGNC:31862] [ENST00000579793]= NOTCH2NL
A_33_P3247372	ENST00000588424	2.02057	0.019046	37233	ENST00000588424	ens|transmembrane phosphatase with tensin homology pseudogene 1 [Source:HGNC Symbol;Acc:HGNC:43648] [ENST00000588424]
A_21_P0005765	ENST00000606279	1.94484	0.0460712	28735	ENST00000606279	Unknown
A_33_P3396326	ENST00000614509	-2.97143	0.0169577	35059	ENST00000614509	tc|ALU1_HUMAN (P39188) Alu subfamily J sequence contamination warning entry
A_33_P3322236	ENST00000615493	2.01095	0.0162203	57160	ENST00000615493	ens|long intergenic non-protein coding RNA 969 [Source:HGNC Symbol;Acc:HGNC:48729] [ENST00000615493]
A_33_P3227842	EPB41	1.93727	0.0430051	54010	NM_001166006	ref|Homo sapiens erythrocyte membrane protein band 4.1 (EPB41)
A_22_P00018367	EPHA1-AS1	-1.53801	0.0313525	42599	NR_033897	ref|Homo sapiens EPHA1 antisense RNA 1 (EPHA1-AS1)
A_24_P627984	EPM2AIP1	2.59454	0.00905092	42789	NM_014805	ref|Homo sapiens EPM2A (laforin) interacting protein 1 (EPM2AIP1)
A_21_P0000884	ERVK13-1	2.14677	0.0175693	7130	NR_040023	ref|Homo sapiens endogenous retrovirus group K13
A_24_P323598	ESCO2	3.59476	0.0121661	48928	NM_001017420	ref|Homo sapiens establishment of sister chromatid cohesion N-acetyltransferase 2 (ESCO2)
A_23_P23303	EXO1	2.02824	0.025612	51071	NM_003686	ref|Homo sapiens exonuclease 1 (EXO1)
A_33_P3390027	EXOC7	1.61183	0.0156968	55870	ENST00000405068	ens|exocyst complex component 7 [Source:HGNC Symbol;Acc:HGNC:23214] [ENST00000405068]
A_24_P751492	FAM221B	-2.82848	0.0162203	31689	NM_001012446	ref|Homo sapiens family with sequence similarity 221
A_33_P3322589	FANCL	1.57631	0.0420582	9833	NM_001114636	ref|Homo sapiens Fanconi anemia
A_23_P131383	FANCL	1.5122	0.038418	20066	NM_018062	ref|Homo sapiens Fanconi anemia
A_24_P307854	FBXL18	1.49632	0.049509	57875	NM_024963	ref|Homo sapiens F-box and leucine-rich repeat protein 18 (FBXL18)
A_22_P00002000	FBXL19-AS1	1.62641	0.0443436	20711	NR_024348	ref|Homo sapiens FBXL19 antisense RNA 1 (head to head) (FBXL19-AS1)
A_23_P151970	FEM1B	-1.67699	0.0407359	21523	NM_015322	ref|Homo sapiens fem-1 homolog b (C. elegans) (FEM1B)
A_33_P3710442	FLJ11710	1.85577	0.0238941	8726	AK021772	gb|Homo sapiens cDNA FLJ11710 fis
A_33_P3249793	FOXO4	1.71538	0.0215454	58789	NM_005938	ref|Homo sapiens forkhead box O4 (FOXO4)
A_24_P120934	GADD45G	-1.52786	0.039712	34923	NM_006705	ref|Homo sapiens growth arrest and DNA-damage-inducible
A_23_P327777	GATS	-2.0517	0.0297664	24915	NM_178831	ref|Homo sapiens GATS
A_33_P3422659	GDAP1	1.80732	0.00953741	5794	NM_018972	ref|Homo sapiens ganglioside induced differentiation associated protein 1 (GDAP1)
A_33_P3340025	GINS1	1.68588	0.0421883	12274	NM_021067	ref|Homo sapiens GINS complex subunit 1 (Psf1 homolog) (GINS1)
A_24_P345377	GOLPH3L	1.50617	0.0344442	1780	NM_018178	ref|Homo sapiens golgi phosphoprotein 3-like (GOLPH3L)
A_24_P332218	GPR149	-2.52574	0.0496929	28841	NM_001038705	ref|Homo sapiens G protein-coupled receptor 149 (GPR149)
A_21_P0004642	HCG27	1.75096	0.0290712	24468	NR_026791	ref|Homo sapiens HLA complex group 27 (non-protein coding) (HCG27)
A_33_P6474088	HCG8	1.82178	0.019046	2253	NR_103542	ref|Homo sapiens HLA complex group 8 (HCG8)
A_23_P70007	HMMR	2.05096	0.030204	23451	NM_012484	ref|Homo sapiens hyaluronan-mediated motility receptor (RHAMM) (HMMR)
A_22_P00005915	HOTAIRM1	-1.53533	0.0274627	57885	NR_038367	ref|Homo sapiens HOXA transcript antisense RNA
A_23_P93772	HOXA5	-2.13241	0.0372532	37165	NM_019102	ref|Homo sapiens homeobox A5 (HOXA5)
A_23_P139527	HPD	-2.41467	0.0245576	38509	NM_002150	ref|Homo sapiens 4-hydroxyphenylpyruvate dioxygenase (HPD)
A_23_P111132	HSPA1A	1.52225	0.0448175	55688	NM_005345	ref|Homo sapiens heat shock 70kDa protein 1A (HSPA1A)
A_23_P111132	HSPA1A	1.50484	0.049157	13127	NM_005345	ref|Homo sapiens heat shock 70kDa protein 1A (HSPA1A)
A_23_P111132	HSPA1A	1.49906	0.0479023	50523	NM_005345	ref|Homo sapiens heat shock 70kDa protein 1A (HSPA1A)
A_23_P111132	HSPA1A	1.49622	0.048454	12763	NM_005345	ref|Homo sapiens heat shock 70kDa protein 1A (HSPA1A)
A_23_P133739	HUS1B	-1.95227	0.0142601	33851	NM_148959	ref|Homo sapiens HUS1 checkpoint homolog b (S. pombe) (HUS1B)
A_24_P602507	HYKK	-1.51919	0.0225462	6177	NM_001013619	ref|Homo sapiens hydroxylysine kinase (HYKK)
A_23_P143143	ID2	-1.55929	0.0337581	53000	NM_002166	ref|Homo sapiens inhibitor of DNA binding 2
A_33_P3229370	ID4	2.39542	0.0158978	9957	NM_001546	ref|Homo sapiens inhibitor of DNA binding 4
A_33_P3277988	IFNAR1	1.51162	0.0385986	20634	NM_000629	ref|Homo sapiens interferon (alpha
A_33_P3286684	IKZF1	1.60988	0.020375	55903	ENST00000484847	ens|IKAROS family zinc finger 1 (Ikaros) [Source:HGNC Symbol;Acc:HGNC:13176] [ENST00000484847]
A_21_P0000171	IL6R	1.56925	0.0161368	25111	NM_001206866	ref|Homo sapiens interleukin 6 receptor (IL6R)
A_33_P3374190	INPP5A	-1.52282	0.0102645	53307	NM_005539	ref|Homo sapiens inositol polyphosphate-5-phosphatase
A_24_P139191	ITCH	-1.5297	0.0169577	10738	NM_031483	ref|Homo sapiens itchy E3 ubiquitin protein ligase (ITCH)
A_23_P117582	JDP2	-1.69003	0.0393298	1420	NM_130469	ref|Homo sapiens Jun dimerization protein 2 (JDP2)
A_23_P117582	JDP2	-1.69709	0.0463951	41345	NM_130469	ref|Homo sapiens Jun dimerization protein 2 (JDP2)
A_23_P117582	JDP2	-1.70828	0.043237	58264	NM_130469	ref|Homo sapiens Jun dimerization protein 2 (JDP2)
A_23_P117582	JDP2	-1.71664	0.034693	35552	NM_130469	ref|Homo sapiens Jun dimerization protein 2 (JDP2)
A_23_P117582	JDP2	-1.72024	0.0352097	52485	NM_130469	ref|Homo sapiens Jun dimerization protein 2 (JDP2)
A_23_P117582	JDP2	-1.72265	0.0276636	26677	NM_130469	ref|Homo sapiens Jun dimerization protein 2 (JDP2)
A_23_P117582	JDP2	-1.7264	0.0347555	44446	NM_130469	ref|Homo sapiens Jun dimerization protein 2 (JDP2)
A_23_P117582	JDP2	-1.73362	0.0352097	25622	NM_130469	ref|Homo sapiens Jun dimerization protein 2 (JDP2)
A_23_P117582	JDP2	-1.73868	0.0241978	28398	NM_130469	ref|Homo sapiens Jun dimerization protein 2 (JDP2)
A_23_P117582	JDP2	-1.7623	0.030204	17067	NM_130469	ref|Homo sapiens Jun dimerization protein 2 (JDP2)
A_24_P156490	KCNMA1	2.73451	0.042117	48628	NM_002247	ref|Homo sapiens potassium channel
A_33_P3236035	KDM4C	-2.15909	0.0220531	33793	BC053678	gb|Homo sapiens cDNA clone IMAGE:6165770
A_24_P314597	KIAA0319L	1.87451	0.0138159	37163	ENST00000485551	ens|KIAA0319-like [Source:HGNC Symbol;Acc:HGNC:30071] [ENST00000485551]
A_23_P74467	KIAA0907	1.70023	0.0225549	18883	NM_014949	ref|Homo sapiens KIAA0907 (KIAA0907)
A_33_P3242659	KIF13A	-2.04289	0.0456395	19819	NM_022113	ref|Homo sapiens kinesin family member 13A (KIF13A)
A_33_P3230548	KIF14	1.99992	0.0241612	57494	NM_014875	ref|Homo sapiens kinesin family member 14 (KIF14)
A_24_P145066	KIF1B	1.87777	0.0441341	60319	NM_183416	ref|Homo sapiens kinesin family member 1B (KIF1B)
A_23_P48835	KIF23	1.55576	0.0456044	23374	NM_138555	ref|Homo sapiens kinesin family member 23 (KIF23)
A_23_P148475	KIF4A	2.28332	0.039712	50632	NM_012310	ref|Homo sapiens kinesin family member 4A (KIF4A)
A_24_P93948	KIF5A	-2.83604	0.0377886	35509	ENST00000455537	ens|kinesin family member 5A [Source:HGNC Symbol;Acc:HGNC:6323] [ENST00000455537]
A_33_P3336592	KLF13	1.90875	0.00677362	4329	AK127052	gb|Homo sapiens cDNA FLJ45109 fis
A_23_P415401	KLF9	-1.55705	0.00979677	19254	NM_001206	ref|Homo sapiens Kruppel-like factor 9 (KLF9)
A_23_P55388	KLHL11	-1.81202	0.0219851	40394	NM_018143	ref|Homo sapiens kelch-like family member 11 (KLHL11)
A_22_P00015402	KMT2E-AS1	-2.06929	0.0169577	16636	NR_024586	ref|Homo sapiens KMT2E antisense RNA 1 (head to head) (KMT2E-AS1)
A_21_P0005609	KMT2E-AS1	-2.09522	0.0099748	11364	NR_024586	ref|Homo sapiens KMT2E antisense RNA 1 (head to head) (KMT2E-AS1)
A_23_P116850	KRT2	-1.71446	0.0175693	9940	NM_000423	ref|Homo sapiens keratin 2
A_33_P3273552	KRT83	-2.76924	0.0403544	59065	NM_002282	ref|Homo sapiens keratin 83
A_23_P363769	KRT86	-4.64704	0.0206912	49012	NM_002284	ref|Homo sapiens keratin 86
A_23_P127565	LAYN	-1.57981	0.0225549	11353	NM_178834	ref|Homo sapiens layilin (LAYN)
A_24_P583225	LINC00265	1.67229	0.00922399	8488	NR_026999	ref|Homo sapiens long intergenic non-protein coding RNA 265 (LINC00265)
A_22_P00000634	LINC00304	-2.09103	0.0316631	36056	NR_024347	ref|Homo sapiens long intergenic non-protein coding RNA 304 (LINC00304)
A_19_P00804777	LINC00662	1.54298	0.0246143	48054	ENST00000586954	ens|long intergenic non-protein coding RNA 662 [Source:HGNC Symbol;Acc:HGNC:27122] [ENST00000586954]
A_19_P00320028	LINC01004	2.20993	0.00922399	3258	NR_039981	ref|Homo sapiens long intergenic non-protein coding RNA 1004 (LINC01004)
A_22_P00023617	LINC01063	-1.59954	0.0210226	29676	XR_246052	ref|PREDICTED: Homo sapiens long intergenic non-protein coding RNA 1063 (LINC01063)
A_19_P00317277	LINC01127	2.5607	0.0307047	26449	NR_103791	ref|Homo sapiens long intergenic non-protein coding RNA 1127 (LINC01127)
A_21_P0010675	LINC01347	1.58756	0.0437046	58297	NR_029401	ref|Homo sapiens long intergenic non-protein coding RNA 1347 (LINC01347)
A_21_P0006078	LINC01410	2.13299	0.0178362	27570	NR_121647	ref|Homo sapiens long intergenic non-protein coding RNA 1410 (LINC01410)
A_22_P00019189	LINC01431	-1.58926	0.00905092	32610	NR_109884	ref|Homo sapiens long intergenic non-protein coding RNA 1431 (LINC01431)
A_22_P00010473	LINC01431	-1.98777	0.0485257	41262	NR_109884	ref|Homo sapiens long intergenic non-protein coding RNA 1431 (LINC01431)
A_19_P00318444	LINC01471	1.9987	0.0341615	46182	NR_125397	ref|Homo sapiens long intergenic non-protein coding RNA 1471 (LINC01471)
A_21_P0013453	LINC-PINT	1.94174	0.0276844	46845	NR_034120	ref|Homo sapiens long intergenic non-protein coding RNA
A_23_P24922	LIPT2	-1.51371	0.00922399	60444	NM_001144869	ref|Homo sapiens lipoyl(octanoyl) transferase 2 (putative) (LIPT2)
A_21_P0009352	lnc-ABCA5-1	1.7301	0.0334644	45684	lnc-ABCA5-1:1	linc|LNCipedia lincRNA (lnc-ABCA5-1)
A_21_P0005568	lnc-AC004980.12.1-1	1.84721	0.0347555	16164	lnc-AC004980.12.1-1:1	linc|LNCipedia lincRNA (lnc-AC004980.12.1-1)
A_21_P0003091	lnc-AC069257.9.1-5	1.81406	0.0128324	5596	lnc-AC069257.9.1-5:4	linc|LNCipedia lincRNA (lnc-AC069257.9.1-5)
A_24_P312325	lnc-AF131215.3.1-1	2.663	0.00953741	14685	lnc-AF131215.3.1-1:1	gb|Homo sapiens mRNA for hypothetical protein (C8ORF15). [AJ312027]
A_22_P00000839	lnc-AGBL1-3	1.853	0.0162203	18580	lnc-AGBL1-3:1	linc|LNCipedia lincRNA (lnc-AGBL1-3)
A_22_P00000871	lnc-AGRP-3	1.79185	0.0155577	30913	lnc-AGRP-3:2	linc|LNCipedia lincRNA (lnc-AGRP-3)
A_21_P0004951	lnc-AIG1-1	-1.77007	0.00905092	38627	lnc-AIG1-1:1	linc|LNCipedia lincRNA (lnc-AIG1-1)
A_22_P00000959	lnc-AL020996.1-1	-1.58093	0.00515042	33335	lnc-AL020996.1-1:2	tc|NM_115901 FK506 binding {Arabidopsis thaliana} (exp=-1; wgp=0; cg=0)
A_21_P0006827	lnc-AL137145.1-3	1.53443	0.0496931	7700	lnc-AL137145.1-3:1	linc|LNCipedia lincRNA (lnc-AL137145.1-3)
A_21_P0006828	lnc-AL137145.1-4	1.53399	0.0343153	23954	lnc-AL137145.1-4:1	linc|LNCipedia lincRNA (lnc-AL137145.1-4)
A_22_P00001060	lnc-ALB-1	-1.73422	0.0241251	7412	lnc-ALB-1:1	linc|LNCipedia lincRNA (lnc-ALB-1)
A_22_P00002147	lnc-BRD1-3	2.12014	0.0194449	7975	lnc-BRD1-3:1	gb|Homo sapiens cDNA FLJ46319 fis
A_22_P00002219	lnc-BZRAP1-1	2.19234	0.00905092	22880	lnc-BZRAP1-1:1	gb|Sequence 48 from Patent WO0220754. [AX721088]
A_22_P00002346	lnc-C11orf96-1	1.50407	0.0244723	55180	lnc-C11orf96-1:1	gb|BX109613 Soares_testis_NHT Homo sapiens cDNA clone IMAGp998H201924
A_22_P00023347	lnc-C12orf49-2	2.59647	0.0137624	37666	lnc-C12orf49-2:1	tc|ALU1_HUMAN (P39188) Alu subfamily J sequence contamination warning entry
A_22_P00002500	lnc-C16orf61-2	2.39668	0.00426125	51586	lnc-C16orf61-2:1	gb|Homo sapiens cDNA clone IMAGE:4248887
A_22_P00002532	lnc-C17orf51-5	2.70815	0.0460401	58131	lnc-C17orf51-5:1	linc|LNCipedia lincRNA (lnc-C17orf51-5)
A_21_P0014063	lnc-C1orf106-1	-2.72416	0.0462439	37933	lnc-C1orf106-1:1	gb|Homo sapiens cDNA FLJ12831 fis
A_21_P0012208	lnc-C21orf58-1	1.76389	0.0172622	39	lnc-C21orf58-1:1	gb|Homo sapiens cDNA FLJ45665 fis
A_21_P0004383	lnc-C5orf39-1	1.96529	0.0124337	56882	lnc-C5orf39-1:5	linc|LNCipedia lincRNA (lnc-C5orf39-1)
A_22_P00003014	lnc-C6orf99-2	-2.50346	0.0241686	40443	lnc-C6orf99-2:1	gb|DKFZp451I0315_r1 451 (synonym: hlcc1) spinal cord Homo sapiens cDNA clone DKFZp451I0315 5'
A_21_P0003733	lnc-CCKAR-1	-1.67626	0.0245627	42689	lnc-CCKAR-1:1	linc|LNCipedia lincRNA (lnc-CCKAR-1)
A_22_P00003622	lnc-CD46-1	1.76767	0.0217889	49261	lnc-CD46-1:1	tc|Q4T6U1_TETNG (Q4T6U1) Chromosome 21 SCAF8611
A_22_P00003797	lnc-CDKAL1-1	2.09568	0.022173	22165	lnc-CDKAL1-1:1	linc|LNCipedia lincRNA (lnc-CDKAL1-1)
A_21_P0014234	lnc-CTSL1-1	2.57565	0.0220531	29292	lnc-CTSL1-1:1	gb|PREDICTED: Homo sapiens DAPK1 intronic transcript 1 (non-protein coding) (DAPK1-IT1)
A_21_P0003604	lnc-DCAF4L1-1	2.77714	0.0316631	51689	lnc-DCAF4L1-1:1	linc|LNCipedia lincRNA (lnc-DCAF4L1-1)
A_22_P00005336	lnc-DPCD-1	1.68899	0.0195516	31070	lnc-DPCD-1:1	linc|LNCipedia lincRNA (lnc-DPCD-1)
A_21_P0012033	lnc-DYNC1I2-1	2.11849	0.0225549	13212	lnc-DYNC1I2-1:1	gb|Homo sapiens cDNA FLJ14080 fis
A_22_P00005942	lnc-EXOC3L4-1	1.53566	0.0486892	52789	lnc-EXOC3L4-1:1	gb|CR736179 Soares_fetal_lung_NbHL19W Homo sapiens cDNA clone IMAGp971A1684 ; IMAGE:1952157 5'
A_22_P00006061	lnc-FAM131B-1	2.29586	0.0130869	51699	lnc-FAM131B-1:1	gb|603077660F1 NIH_MGC_119 Homo sapiens cDNA clone IMAGE:5169447 5'
A_21_P0008109	lnc-FARP1-1	-1.72746	0.0460712	484	lnc-FARP1-1:2	linc|LNCipedia lincRNA (lnc-FARP1-1)
A_21_P0002300	lnc-FMNL2-1	-1.77912	0.0353802	35287	lnc-FMNL2-1:1	linc|LNCipedia lincRNA (lnc-FMNL2-1)
A_33_P3414944	lnc-GABARAPL3-4	-2.21159	0.0453456	39165	lnc-GABARAPL3-4:1	linc|LNCipedia lincRNA (lnc-GABARAPL3-4)
A_33_P6818008	lnc-GGCT-1	2.05141	0.0318121	45468	lnc-GGCT-1:6	linc|LNCipedia lincRNA (lnc-GGCT-1)
A_21_P0008372	lnc-GPR65-1	1.85693	0.0194449	48917	lnc-GPR65-1:14	linc|LNCipedia lincRNA (lnc-GPR65-1)
A_22_P00007350	lnc-GPX1-1	2.1249	0.00953741	9616	lnc-GPX1-1:1	linc|LNCipedia lincRNA (lnc-GPX1-1)
A_22_P00007523	lnc-HAAO-1	1.89458	0.0271965	26098	lnc-HAAO-1:2	linc|LNCipedia lincRNA (lnc-HAAO-1)
A_22_P00007780	lnc-HNRNPA3-2	-1.60032	0.0474036	47417	lnc-HNRNPA3-2:1	linc|LNCipedia lincRNA (lnc-HNRNPA3-2)
A_22_P00007962	lnc-ID1-1	1.56309	0.0259836	13311	lnc-ID1-1:1	linc|LNCipedia lincRNA (lnc-ID1-1)
A_21_P0008135	lnc-KATNAL1-3	3.02075	0.0169099	46192	lnc-KATNAL1-3:21	tc|Q4HH67_CAMCO (Q4HH67) Multi-drug resistance protein
A_21_P0008137	lnc-KATNAL1-3	1.79934	0.0273095	28494	lnc-KATNAL1-3:3	linc|LNCipedia lincRNA (lnc-KATNAL1-3)
A_21_P0003208	lnc-KIAA0226-3	1.66251	0.0143301	19545	lnc-KIAA0226-3:1	linc|LNCipedia lincRNA (lnc-KIAA0226-3)
A_21_P0001273	lnc-LDLRAP1-1	-1.67345	0.0394085	29827	lnc-LDLRAP1-1:2	ref|PREDICTED: Homo sapiens low density lipoprotein receptor adaptor protein 1 (LDLRAP1)
A_22_P00009054	lnc-LEKR1-4	-1.69888	0.0473383	7429	lnc-LEKR1-4:4	linc|LNCipedia lincRNA (lnc-LEKR1-4)
A_21_P0009591	lnc-MBP-1	1.79438	0.0161368	21182	lnc-MBP-1:3	linc|LNCipedia lincRNA (lnc-MBP-1)
A_22_P00023797	lnc-MDM4-1	1.77731	0.0106362	40587	lnc-MDM4-1:1	tc|Q5SKQ4_THET8 (Q5SKQ4) Branched-chain amino acid ABC transporter permease protein
A_22_P00019273	lnc-MED7-1	1.51481	0.0356584	58004	lnc-MED7-1:1	gb|Homo sapiens cDNA FLJ34312 fis
A_22_P00009995	lnc-MLLT4-1	-2.57619	0.0161539	34066	lnc-MLLT4-1:1	linc|LNCipedia lincRNA (lnc-MLLT4-1)
A_19_P00317023	lnc-MYC-2	1.87856	0.0195332	52996	lnc-MYC-2:22	gb|Homo sapiens cDNA FLJ26234 fis
A_21_P0003294	lnc-NAA50-2	1.63976	0.0181752	20332	lnc-NAA50-2:1	gb|Homo sapiens cDNA clone IMAGE:4797099. [BC030754]
A_21_P0009344	lnc-NACA2-2	2.3474	0.013896	48298	lnc-NACA2-2:1	linc|LNCipedia lincRNA (lnc-NACA2-2)
A_22_P00010973	lnc-NRIP2-2	1.73482	0.0128324	57202	lnc-NRIP2-2:1	linc|LNCipedia lincRNA (lnc-NRIP2-2)
A_22_P00010993	lnc-NRXN1-2	-1.60235	0.0245627	17379	lnc-NRXN1-2:1	linc|LNCipedia lincRNA (lnc-NRXN1-2)
A_22_P00011692	lnc-PDHX-1	1.71614	0.0381956	30700	lnc-PDHX-1:1	gb|Homo sapiens full length insert cDNA clone ZE10H04. [AF086543]
A_22_P00012028	lnc-PLEKHA3-4	-1.83909	0.0193315	37255	lnc-PLEKHA3-4:1	gb|AGENCOURT_16379401 NIH_MGC_227 Homo sapiens cDNA clone IMAGE:30718075 5'
A_22_P00012124	lnc-POLN-1	-1.76643	0.0169649	33752	lnc-POLN-1:1	gb|zl35c04.r1 Soares_pregnant_uterus_NbHPU Homo sapiens cDNA clone IMAGE:503910 5'
A_22_P00012145	lnc-POLR3E-2	2.09205	0.0230552	48617	lnc-POLR3E-2:2	gb|Homo sapiens hypothetical LOC440346
A_22_P00012196	lnc-POU5F1B-3	-1.71186	0.0195516	34886	lnc-POU5F1B-3:3	linc|LNCipedia lincRNA (lnc-POU5F1B-3)
A_21_P0006321	lnc-PTGES2-1	1.79283	0.0244723	224	lnc-PTGES2-1:5	linc|LNCipedia lincRNA (lnc-PTGES2-1)
A_22_P00012835	lnc-RASA1-3	1.77839	0.0494875	55864	lnc-RASA1-3:6	linc|LNCipedia lincRNA (lnc-RASA1-3)
A_21_P0004024	lnc-RASA1-3	1.76098	0.0380291	23408	lnc-RASA1-3:1	linc|LNCipedia lincRNA (lnc-RASA1-3)
A_22_P00012938	lnc-RCSD1-1	1.57804	0.0273679	49369	lnc-RCSD1-1:1	tc|Q4BPG8_BURVI (Q4BPG8) DNA-directed DNA polymerase
A_22_P00012970	lnc-RELT-1	1.53376	0.0423076	2048	lnc-RELT-1:1	linc|LNCipedia lincRNA (lnc-RELT-1)
A_33_P3474859	lnc-RP11-195B21.3.1-2	1.71275	0.0118783	35479	lnc-RP11-195B21.3.1-2:1	gb|Homo sapiens cDNA clone IMAGE:5498355. [BC110369]
A_22_P00013623	lnc-RP11-58E21.3.1-1	1.61478	0.0381111	24167	lnc-RP11-58E21.3.1-1:1	linc|LNCipedia lincRNA (lnc-RP11-58E21.3.1-1)
A_22_P00013817	lnc-RPA2-1	1.82166	0.0403109	19904	lnc-RPA2-1:1	linc|LNCipedia lincRNA (lnc-RPA2-1)
A_22_P00013857	lnc-RPL7L1-1	1.86933	0.0229852	5900	lnc-RPL7L1-1:1	gb|Homo sapiens cDNA FLJ40915 fis
A_19_P00803086	lnc-RPRML-3	1.60406	0.0243474	55414	lnc-RPRML-3:2	linc|LNCipedia lincRNA (lnc-RPRML-3)
A_22_P00014599	lnc-SLC15A1-1	1.78256	0.0248911	919	lnc-SLC15A1-1:1	gb|Homo sapiens cDNA: FLJ23243 fis
A_21_P0004257	lnc-SREK1-1	-2.30644	0.0202795	33319	lnc-SREK1-1:4	linc|LNCipedia lincRNA (lnc-SREK1-1)
A_21_P0005495	lnc-SUN3-1	-1.49612	0.034445	38990	lnc-SUN3-1:1	linc|LNCipedia lincRNA (lnc-SUN3-1)
A_22_P00015892	lnc-TCF19-1	1.70317	0.0114057	45212	lnc-TCF19-1:4	gb|PREDICTED: Homo sapiens uncharacterized LOC100996357
A_22_P00025136	lnc-TIGIT-1	1.69678	0.0343988	48850	lnc-TIGIT-1:2	gb|Homo sapiens cDNA FLJ35583 fis
A_21_P0009420	lnc-TMEM105-2	2.30092	0.0399566	60833	lnc-TMEM105-2:2	linc|LNCipedia lincRNA (lnc-TMEM105-2)
A_19_P00800555	lnc-UQCRFS1-7	1.73006	0.0106362	25709	lnc-UQCRFS1-7:1	tc|Q982T4_RHILO (Q982T4) Mll8506 protein
A_21_P0005565	lnc-VKORC1L1-1	1.76472	0.0106362	19069	lnc-VKORC1L1-1:1	gb|DB461521 RIKEN full-length enriched human cDNA library
A_24_P693433	lnc-VSIG10-1	1.68365	0.0392184	39683	lnc-VSIG10-1:1	gb|Homo sapiens cDNA FLJ12302 fis
A_22_P00023177	lnc-VTI1A-3	2.64105	0.0182793	7845	lnc-VTI1A-3:1	gb|Homo sapiens cDNA: FLJ21484 fis
A_22_P00017934	lnc-ZFP90-2	1.96062	0.0420278	1624	lnc-ZFP90-2:1	gb|xa70d05.x1 NCI_CGAP_HSC2 Homo sapiens cDNA clone IMAGE:2572137 3' similar to contains Alu repetitive element;
A_22_P00017999	lnc-ZNF132-1	1.70559	0.0356403	14235	lnc-ZNF132-1:1	gb|Homo sapiens cDNA FLJ38721 fis
A_22_P00018190	lnc-ZNF609-2	1.66856	0.0304592	59133	lnc-ZNF609-2:1	gb|QV4-FT0004-250500-231-e11 FT0004 Homo sapiens cDNA
A_22_P00018327	lnc-ZNF91-2	1.61287	0.0381111	27356	lnc-ZNF91-2:1	linc|LNCipedia lincRNA (lnc-ZNF91-2)
A_24_P135427	LOC100128398	1.62516	0.0105134	24787	NR_036508	ref|Homo sapiens uncharacterized LOC100128398 (LOC100128398)
A_33_P3403937	LOC100129399	1.69137	0.0297991	52403	AK124011	gb|Homo sapiens cDNA FLJ42017 fis
A_24_P497318	LOC100129973	-2.07018	0.0260242	37029	NR_102751	ref|Homo sapiens uncharacterized LOC100129973 (LOC100129973)
A_33_P3294177	LOC100131043	2.44182	0.0343153	6984	AK124222	gb|Homo sapiens cDNA FLJ42228 fis
A_24_P788373	LOC100132661	-4.72464	0.0210058	38967	AF130044	gb|Homo sapiens clone FLB1825 PRO0419 mRNA
A_33_P3376454	LOC100133299	2.08241	0.0294438	42420	AY358688	gb|Homo sapiens clone DNA62312 GALI1870 (UNQ1870) mRNA
A_24_P693321	LOC100190986	1.84996	0.0214042	33089	NR_024456	ref|Homo sapiens uncharacterized LOC100190986 (LOC100190986)
A_22_P00010195	LOC100287042	2.42237	0.0452952	45406	NR_036520	ref|Homo sapiens uncharacterized LOC100287042 (LOC100287042)
A_21_P0000185	LOC100505549	1.84458	0.0233048	58563	NM_001242804	ref|Homo sapiens uncharacterized LOC100505549 (LOC100505549)
A_33_P3358621	LOC100506036	-1.94292	0.0216557	10846	ENST00000608609	ref|PREDICTED: Homo sapiens uncharacterized LOC100506036 (LOC100506036)
A_22_P00003499	LOC100506282	1.62284	0.0385986	7151	ENST00000529607	Unknown
A_33_P3732466	LOC100506282	1.60317	0.0434163	12261	XR_110899	ref|PREDICTED: Homo sapiens uncharacterized LOC100506282 (LOC100506282)
A_21_P0014806	LOC100507131	1.66533	0.0397378	13025	XR_132626	ref|PREDICTED: Homo sapiens uncharacterized LOC100507131 (LOC100507131)
A_33_P3363630	LOC100996412	2.34571	0.0241251	25812	XM_005275733	ref|PREDICTED: Homo sapiens uncharacterized LOC100996412 (LOC100996412)
A_24_P929441	LOC100996535	-2.27672	0.0145705	35820	XM_005275924	ref|PREDICTED: Homo sapiens collagen alpha-1(I) chain-like (LOC100996535)
A_21_P0001018	LOC100996741	1.92896	0.00777992	50909	XR_250844	ref|PREDICTED: Homo sapiens uncharacterized LOC100996741 (LOC100996741)
A_32_P190461	LOC101926894	1.61206	0.0241251	16391	XR_427592	ref|PREDICTED: Homo sapiens uncharacterized LOC101926894 (LOC101926894)
A_19_P00808348	LOC101927151	2.24749	0.0099748	50670	ENST00000586784	Unknown
A_19_P00807384	LOC101927151	1.63411	0.0496929	31459	NR_110687	ref|Homo sapiens uncharacterized LOC101927151 (LOC101927151)
A_21_P0003401	LOC101927305	-1.86327	0.0364136	38245	NR_125883	ref|Homo sapiens uncharacterized LOC101927305 (LOC101927305)
A_22_P00009816	LOC101927632	-1.83318	0.0137624	38104	XR_242320	ref|PREDICTED: Homo sapiens uncharacterized LOC101927632 (LOC101927632)
A_22_P00001976	LOC101928714	1.69044	0.0357878	48106	ENST00000569267	ref|PREDICTED: Homo sapiens uncharacterized LOC101928714 (LOC101928714)
A_22_P00018564	LOC101928725	1.70251	0.0215432	53869	ENST00000500929	ref|PREDICTED: Homo sapiens uncharacterized LOC101928725 (LOC101928725)
A_21_P0008362	LOC101928767	-1.51052	0.0381744	33805	NR_110155	ref|Homo sapiens uncharacterized LOC101928767 (LOC101928767)
A_21_P0010673	LOC101928976	2.04544	0.00922399	8998	ENST00000617077	Unknown
A_22_P00002954	LOC101929261	-2.71978	0.0318121	7873	ENST00000514869	ref|PREDICTED: Homo sapiens uncharacterized LOC101929261 (LOC101929261)
A_22_P00015514	LOC101929294	-2.07171	0.0487231	37128	NR_125808	ref|Homo sapiens uncharacterized LOC101929294 (LOC101929294)
A_21_P0008862	LOC101929560	-2.43363	0.0223351	35729	ENST00000559267	ref|PREDICTED: Homo sapiens uncharacterized LOC101929560 (LOC101929560)
A_21_P0014694	LOC101929910	1.93756	0.0486612	35671	XR_433240	ref|PREDICTED: Homo sapiens nuclear pore complex-interacting protein family member B4-like (LOC101929910)
A_22_P00015661	LOC101930316	2.2044	0.0463107	58527	XR_247649	ref|PREDICTED: Homo sapiens uncharacterized LOC101930316 (LOC101930316)
A_21_P0011508	LOC102723970	-2.16637	0.0155577	37497	XR_424787	ref|PREDICTED: Homo sapiens uncharacterized LOC102723970 (LOC102723970)
A_33_P3422253	LOC102724233	2.62343	0.0420278	51058	XR_425408	ref|PREDICTED: Homo sapiens uncharacterized LOC102724233 (LOC102724233)
A_22_P00011653	LOC102724626	-2.87214	0.0241251	31558	XR_427345	ref|PREDICTED: Homo sapiens uncharacterized LOC102724626 (LOC102724626)
A_21_P0012899	LOC102725134	1.81839	0.0243474	17594	XR_431880	ref|PREDICTED: Homo sapiens uncharacterized LOC102725134 (LOC102725134)
A_21_P0014684	LOC102725157	1.93338	0.022173	37430	XR_433225	ref|PREDICTED: Homo sapiens nuclear pore complex-interacting protein family member B4-like (LOC102725157)
A_33_P3544880	LOC142937	2.28762	0.0106362	8875	BC008131	gb|Homo sapiens cDNA clone IMAGE:3454038. [BC008131]
A_33_P3323760	LOC153684	1.63723	0.0127369	5599	NR_015447	ref|Homo sapiens uncharacterized LOC153684 (LOC153684)
A_33_P3242614	LOC606724	1.55001	0.020375	54550	NR_002454	ref|Homo sapiens coronin
A_33_P3226407	LOC649305	1.76955	0.045579	50515	XR_432303	ref|PREDICTED: Homo sapiens uncharacterized LOC649305 (LOC649305)
A_33_P3355040	LOC728903	1.74181	0.0454969	44843	AK093722	gb|Homo sapiens cDNA FLJ36403 fis
A_21_P0013194	LOC729737	1.62576	0.036248	6772	NR_039983	ref|Homo sapiens uncharacterized LOC729737 (LOC729737)
A_24_P170774	LRCH1	2.16194	0.0118783	5882	NM_015116	ref|Homo sapiens leucine-rich repeats and calponin homology (CH) domain containing 1 (LRCH1)
A_33_P3263217	LRRC4	1.72892	0.049157	57759	NM_022143	ref|Homo sapiens leucine rich repeat containing 4 (LRRC4)
A_23_P166848	LTF	12.5588	0.0241251	48603	NM_002343	ref|Homo sapiens lactotransferrin (LTF)
A_22_P00014171	MALAT1	1.66324	0.047623	46610	NR_002819	ref|Homo sapiens metastasis associated lung adenocarcinoma transcript 1 (non-protein coding) (MALAT1)
A_23_P23996	MAT1A	1.93424	0.0394001	50382	NM_000429	ref|Homo sapiens methionine adenosyltransferase I
A_23_P436138	MAX	-1.50341	0.0314944	18020	NM_145114	ref|Homo sapiens MYC associated factor X (MAX)
A_33_P3227990	MBP	-1.65092	0.0241251	29016	NM_001025101	ref|Homo sapiens myelin basic protein (MBP)
A_33_P3318971	METTL20	1.78577	0.0292262	2762	ENST00000357721	ens|methyltransferase like 20 [Source:HGNC Symbol;Acc:HGNC:28739] [ENST00000357721]
A_33_P3384322	METTL22	2.06026	0.0141766	55129	ENST00000381920	ens|methyltransferase like 22 [Source:HGNC Symbol;Acc:HGNC:28368] [ENST00000381920]
A_23_P28507	MGAT4A	-1.84317	0.0221701	58721	NM_012214	ref|Homo sapiens mannosyl (alpha-1
A_23_P4714	MIA	1.79731	0.0303178	29680	NM_006533	ref|Homo sapiens melanoma inhibitory activity (MIA)
A_19_P00322571	MIAT	1.93379	0.0393298	53872	NR_033319	ref|Homo sapiens myocardial infarction associated transcript (non-protein coding) (MIAT)
A_22_P00003466	MMP25-AS1	1.67648	0.0168328	3274	XR_424759	ref|PREDICTED: Homo sapiens uncharacterized LOC100507419 (RP11-473M20.7)
A_33_P3346936	MON2	-1.98189	0.0266319	39808	ENST00000549378	ens|MON2 homolog (S. cerevisiae) [Source:HGNC Symbol;Acc:HGNC:29177] [ENST00000549378]
A_33_P3422466	MORN3	-1.63261	0.00953741	21249	NM_173855	ref|Homo sapiens MORN repeat containing 3 (MORN3)
A_33_P3380126	MORN3	-1.66733	0.0161539	37215	NM_173855	ref|Homo sapiens MORN repeat containing 3 (MORN3)
A_33_P3415207	MPV17	1.52908	0.0441754	12028	ENST00000616707	ens|MpV17 mitochondrial inner membrane protein [Source:HGNC Symbol;Acc:HGNC:7224] [ENST00000616707]
A_33_P6570838	MPV17L	1.89772	0.0297664	47927	ENST00000287594	ens|MPV17 mitochondrial membrane protein-like [Source:HGNC Symbol;Acc:HGNC:26827] [ENST00000287594]
A_33_P3223088	MRPL19	-2.2818	0.0385986	18912	ENST00000409374	ens|mitochondrial ribosomal protein L19 [Source:HGNC Symbol;Acc:HGNC:14052] [ENST00000409374]
A_33_P3256997	MS4A4E	2.00894	0.0225488	53415	ENST00000398984	ens|membrane-spanning 4-domains
A_23_P112846	MTHFD2L	-1.93755	0.0241251	41247	NM_001144978	ref|Homo sapiens methylenetetrahydrofolate dehydrogenase (NADP+ dependent) 2-like (MTHFD2L)
A_23_P404045	MTHFR	1.59794	0.0161368	45671	NM_005957	ref|Homo sapiens methylenetetrahydrofolate reductase (NAD(P)H) (MTHFR)
A_33_P3389917	MTR	2.91083	0.0172622	51383	NM_000254	ref|Homo sapiens 5-methyltetrahydrofolate-homocysteine methyltransferase (MTR)
A_24_P195669	MYO15B	1.58452	0.0392184	23586	ENST00000581866	ens|myosin XVB pseudogene [Source:HGNC Symbol;Acc:HGNC:14083] [ENST00000581866]
A_33_P3373892	NAA35	1.60182	0.0463951	4282	ENST00000376040	ens|N(alpha)-acetyltransferase 35
A_21_P0012993	NAIP	1.8901	0.0481109	30989	ENST00000447012	ens|NLR family
A_22_P00015282	NBPF1	1.76142	0.00953741	55416	NM_017940	ref|Homo sapiens neuroblastoma breakpoint family
A_22_P00023495	NDUFV2-AS1	-1.59774	0.0169577	49142	NR_110771	ref|Homo sapiens NDUFV2 antisense RNA 1 (NDUFV2-AS1)
A_19_P00321332	NEAT1	1.9382	0.00953741	10995	NR_028272	ref|Homo sapiens nuclear paraspeckle assembly transcript 1 (non-protein coding) (NEAT1)
A_23_P35219	NEK2	2.67274	0.0276844	56694	NM_002497	ref|Homo sapiens NIMA-related kinase 2 (NEK2)
A_24_P136551	NPLOC4	1.93468	0.0315018	9973	ENST00000374747	ens|nuclear protein localization 4 homolog (S. cerevisiae) [Source:HGNC Symbol;Acc:HGNC:18261] [ENST00000374747]
A_23_P213699	NRG2	1.62785	0.0241251	14248	NM_013982	ref|Homo sapiens neuregulin 2 (NRG2)
A_33_P3297415	NRP2	-2.11148	0.0218491	37692	NM_201264	ref|Homo sapiens neuropilin 2 (NRP2)
A_33_P3273063	NUP43	1.66704	0.0214042	31190	NM_198887	ref|Homo sapiens nucleoporin 43kDa (NUP43)
A_23_P31055	NUP43	1.59023	0.00976009	29045	NM_198887	ref|Homo sapiens nucleoporin 43kDa (NUP43)
A_19_P00319917	NUP50-AS1	1.51197	0.0347555	152	NR_038956	ref|Homo sapiens NUP50 antisense RNA 1 (head to head) (NUP50-AS1)
A_21_P0010949	NUTM2B-AS1	1.58577	0.0420582	16448	NR_120611	ref|Homo sapiens NUTM2B antisense RNA 1 (NUTM2B-AS1)
A_24_P102053	OCLN	2.03437	0.020375	51005	NM_002538	ref|Homo sapiens occludin (OCLN)
A_23_P55286	OMG	2.50588	0.0276844	46521	NM_002544	ref|Homo sapiens oligodendrocyte myelin glycoprotein (OMG)
A_33_P3376080	OR1J1	1.85977	0.0225462	45711	NM_001004451	ref|Homo sapiens olfactory receptor
A_33_P3215744	PART1	-1.81621	0.0377886	39951	NR_028508	ref|Homo sapiens prostate androgen-regulated transcript 1 (non-protein coding) (PART1)
A_33_P3392123	PCED1B-AS1	1.55662	0.0164093	53553	NR_026544	ref|Homo sapiens PCED1B antisense RNA 1 (PCED1B-AS1)
A_21_P0013977	PCID2	1.64197	0.0245627	50065	ENST00000493650	ens|PCI domain containing 2 [Source:HGNC Symbol;Acc:HGNC:25653] [ENST00000493650]
A_32_P216872	PDXDC2P	1.66051	0.01102	50702	BX647358	gb|Homo sapiens mRNA; cDNA DKFZp686B0962 (from clone DKFZp686B0962). [BX647358]
A_23_P393401	PDXDC2P	1.55337	0.0137624	58276	NR_003610	ref|Homo sapiens pyridoxal-dependent decarboxylase domain containing 2
A_23_P89589	PER1	-2.79165	0.0287376	8437	NM_002616	ref|Homo sapiens period circadian clock 1 (PER1)
A_33_P3321602	PHACTR4	1.89902	0.0138159	47616	ENST00000493669	ens|phosphatase and actin regulator 4 [Source:HGNC Symbol;Acc:HGNC:25793] [ENST00000493669]
A_23_P134384	PHF14	-2.13945	0.0327869	7211	NM_014660	ref|Homo sapiens PHD finger protein 14 (PHF14)
A_23_P416468	PIF1	1.4974	0.043237	12406	NM_025049	ref|Homo sapiens PIF1 5'-to-3' DNA helicase (PIF1)
A_23_P118174	PLK1	2.05611	0.0343411	48681	ENST00000562272	ens|polo-like kinase 1 [Source:HGNC Symbol;Acc:HGNC:9077] [ENST00000562272]
A_22_P00012059	PLLP	2.16784	0.0353384	59357	ENST00000564376	ens|plasmolipin [Source:HGNC Symbol;Acc:HGNC:18553] [ENST00000564376]
A_23_P100711	PMP22	-1.86712	0.04332	44363	NM_000304	ref|Homo sapiens peripheral myelin protein 22 (PMP22)
A_23_P100711	PMP22	-1.91905	0.0392858	60115	NM_000304	ref|Homo sapiens peripheral myelin protein 22 (PMP22)
A_23_P100711	PMP22	-1.93171	0.0463055	15172	NM_000304	ref|Homo sapiens peripheral myelin protein 22 (PMP22)
A_23_P100711	PMP22	-1.94071	0.0439065	10438	NM_000304	ref|Homo sapiens peripheral myelin protein 22 (PMP22)
A_23_P100711	PMP22	-1.95387	0.0402196	25080	NM_000304	ref|Homo sapiens peripheral myelin protein 22 (PMP22)
A_23_P100711	PMP22	-1.98821	0.026016	61137	NM_000304	ref|Homo sapiens peripheral myelin protein 22 (PMP22)
A_23_P218827	POLQ	1.82679	0.0222676	36152	NM_199420	ref|Homo sapiens polymerase (DNA directed)
A_21_P0014729	POLR2J4	1.56651	0.0106362	59419	BC017341	gb|Homo sapiens polymerase (RNA) II (DNA directed) polypeptide J4
A_33_P3334292	PPIAL4G	1.61163	0.0246143	11114	ENST00000419275	ens|peptidylprolyl isomerase A (cyclophilin A)-like 4G [Source:HGNC Symbol;Acc:HGNC:33996] [ENST00000419275]
A_33_P3314356	PPM1K	1.89865	0.0302679	59891	ENST00000506423	ens|protein phosphatase
A_23_P408285	PRICKLE1	1.98674	0.0265051	52167	NM_153026	ref|Homo sapiens prickle homolog 1 (Drosophila) (PRICKLE1)
A_23_P371410	PRKACB	-1.74318	0.021448	22242	NM_207578	ref|Homo sapiens protein kinase
A_21_P0006824	PRKCQ-AS1	1.55961	0.0202795	51720	ENST00000607982	ens|PRKCQ antisense RNA 1 [Source:HGNC Symbol;Acc:HGNC:44689] [ENST00000607982]
A_23_P400298	PRSS22	-1.62292	0.0474003	35116	NM_022119	ref|Homo sapiens protease
A_23_P12866	PSTK	-1.55864	0.0225549	18941	NM_153336	ref|Homo sapiens phosphoseryl-tRNA kinase (PSTK)
A_23_P373687	PUS10	1.6116	0.0304896	58561	NM_144709	ref|Homo sapiens pseudouridylate synthase 10 (PUS10)
A_33_P3236392	PVRL4	-3.36633	0.0486892	35107	NM_030916	ref|Homo sapiens poliovirus receptor-related 4 (PVRL4)
A_19_P00317871	PVT1	-1.53098	0.0495606	54216	NR_003367	ref|Homo sapiens Pvt1 oncogene (non-protein coding) (PVT1)
A_33_P3224483	RABL2B	1.73918	0.00777992	59010	BC020495	gb|Homo sapiens RAB
A_32_P30831	RAD51-AS1	1.52162	0.0403544	50805	NR_040058	ref|Homo sapiens RAD51 antisense RNA 1 (head to head) (RAD51-AS1)
A_23_P50946	RAMP1	-1.89541	0.0460712	13039	NM_005855	ref|Homo sapiens receptor (G protein-coupled) activity modifying protein 1 (RAMP1)
A_33_P3233906	RAMP1	-1.96719	0.0225462	1759	NM_005855	ref|Homo sapiens receptor (G protein-coupled) activity modifying protein 1 (RAMP1)
A_33_P3268974	RECQL5	1.83524	0.0274627	59165	NM_001003716	ref|Homo sapiens RecQ protein-like 5 (RECQL5)
A_33_P3418000	RELL1	-1.8876	0.0496278	23357	NM_001085399	ref|Homo sapiens RELT-like 1 (RELL1)
A_21_P0000023	RIOK2	-2.81022	0.0430964	1993	NM_001159749	ref|Homo sapiens RIO kinase 2 (RIOK2)
A_33_P3394075	RIT1	-1.51075	0.0268629	49332	NM_006912	ref|Homo sapiens Ras-like without CAAX 1 (RIT1)
A_24_P406060	RNF144B	-1.67502	0.0202795	20226	NM_182757	ref|Homo sapiens ring finger protein 144B (RNF144B)
A_33_P3212037	RNGTT	1.86433	0.0377886	53669	ENST00000369475	ens|RNA guanylyltransferase and 5'-phosphatase [Source:HGNC Symbol;Acc:HGNC:10073] [ENST00000369475]
A_21_P0000502	RNU11	-1.78778	0.0099748	24672	NR_004407	ref|Homo sapiens RNA
A_33_P3279708	RNU2-1	-2.12202	0.0125583	10201	NR_002716	ref|Homo sapiens RNA
A_33_P3839897	RNU4ATAC	-2.41112	0.0238658	6842	DW419002	gb|HHAGE001732 Human liver regeneration after partial hepatectomy Homo sapiens cDNA
A_33_P3267263	RNVU1-18	-1.57032	0.0214972	50659	NR_004400	ref|Homo sapiens RNA
A_22_P00006622	RORA-AS1	2.47751	0.0487551	42460	XR_429541	ref|PREDICTED: Homo sapiens uncharacterized LOC101928784 (RP11-219B17.1)
A_33_P3281552	RPGR	1.93448	0.0321573	50265	NM_001034853	ref|Homo sapiens retinitis pigmentosa GTPase regulator (RPGR)
A_23_P416305	RPL27A	-1.74527	0.0279454	60277	NM_000990	ref|Homo sapiens ribosomal protein L27a (RPL27A)
A_24_P941708	RUFY2	1.57093	0.0412631	10981	NM_001042417	ref|Homo sapiens RUN and FYVE domain containing 2 (RUFY2)
A_24_P65941	RUNX1-IT1	1.91286	0.0335869	47029	NR_026812	ref|Homo sapiens RUNX1 intronic transcript 1 (non-protein coding) (RUNX1-IT1)
A_23_P145874	SAMD9L	1.5615	0.0266914	37168	ENST00000411955	ens|sterile alpha motif domain containing 9-like [Source:HGNC Symbol;Acc:HGNC:1349] [ENST00000411955]
A_33_P3264846	SAMD9L	1.49962	0.0450336	22409	ENST00000610760	ens|sterile alpha motif domain containing 9-like [Source:HGNC Symbol;Acc:HGNC:1349] [ENST00000610760]
A_33_P3704280	SAP30L-AS1	2.22854	0.0259836	44003	AK095428	gb|Homo sapiens cDNA FLJ38109 fis
A_23_P6818	SEMA3G	1.86028	0.0403634	52906	NM_020163	ref|Homo sapiens sema domain
A_33_P3338449	SGK494	2.31094	0.0241251	47858	NM_001174103	ref|Homo sapiens uncharacterized serine/threonine-protein kinase SgK494 (SGK494)
A_23_P79259	SH3BP4	-2.09392	0.022173	34685	NM_014521	ref|Homo sapiens SH3-domain binding protein 4 (SH3BP4)
A_21_P0001002	SLC16A1-AS1	1.69513	0.0164093	7093	NR_103744	ref|Homo sapiens SLC16A1 antisense RNA 1 (SLC16A1-AS1)
A_33_P3255499	SLC25A51	1.58792	0.0485896	61196	NR_024872	ref|Homo sapiens solute carrier family 25
A_33_P3238425	SLC2A7	-4.02943	0.0347555	36021	NM_207420	ref|Homo sapiens solute carrier family 2 (facilitated glucose transporter)
A_23_P59988	SLC35G5	1.75936	0.0138159	51146	NM_054028	ref|Homo sapiens solute carrier family 35
A_33_P3277110	SLC5A3	1.56199	0.0162052	42054	NM_006933	ref|Homo sapiens solute carrier family 5 (sodium/myo-inositol cotransporter)
A_23_P76386	SLC6A12	1.59867	0.028673	44411	NM_003044	ref|Homo sapiens solute carrier family 6 (neurotransmitter transporter)
A_32_P182812	SLC6A4	-2.00356	0.0385986	35816	NM_001045	ref|Homo sapiens solute carrier family 6 (neurotransmitter transporter)
A_21_P0012944	SMA4	1.78801	0.0276844	39311	NR_024054	ref|Homo sapiens glucuronidase
A_33_P3220470	SMAD6	-4.34756	0.0316523	40450	NM_005585	ref|Homo sapiens SMAD family member 6 (SMAD6)
A_23_P326142	SND1-IT1	1.9824	0.020375	7531	NR_027330	ref|Homo sapiens SND1 intronic transcript 1 (non-protein coding) (SND1-IT1)
A_33_P3222367	SNORA74B	1.52385	0.0178362	24066	NR_002988	ref|Homo sapiens small nucleolar RNA
A_33_P3338440	SNX29	1.92888	0.0274111	10551	BC029857	gb|Homo sapiens sorting nexin 29
A_23_P327483	SPATA6	-1.59571	0.0478542	61214	NM_019073	ref|Homo sapiens spermatogenesis associated 6 (SPATA6)
A_24_P161261	SPDYE2	1.85177	0.0381389	49595	NM_001031618	ref|Homo sapiens speedy/RINGO cell cycle regulator family member E2 (SPDYE2)
A_32_P85330	ST20-AS1	-1.66726	0.0273095	35709	NR_028330	ref|Homo sapiens ST20 antisense RNA 1 (ST20-AS1)
A_21_P0003588	STIM2	1.54435	0.0162203	2946	ENST00000478425	ens|stromal interaction molecule 2 [Source:HGNC Symbol;Acc:HGNC:19205] [ENST00000478425]
A_23_P342600	STK35	-1.56009	0.0420582	7466	NM_080836	ref|Homo sapiens serine/threonine kinase 35 (STK35)
A_33_P3269208	STX19	-3.83009	0.0315217	38167	NM_001001850	ref|Homo sapiens syntaxin 19 (STX19)
A_33_P3264272	SYF2	-1.85319	0.0338535	47924	NM_015484	ref|Homo sapiens SYF2 pre-mRNA-splicing factor (SYF2)
A_33_P3379091	SYNGR1	-1.54661	0.0139288	31789	NM_145731	ref|Homo sapiens synaptogyrin 1 (SYNGR1)
A_33_P3335984	TAPT1-AS1	1.73059	0.0376741	45323	BC132927	gb|Homo sapiens hypothetical FLJ39653
A_23_P403955	TARDBP	1.53189	0.0210226	1907	NM_007375	ref|Homo sapiens TAR DNA binding protein (TARDBP)
A_23_P64888	TAS2R10	1.77963	0.0345888	28649	NM_023921	ref|Homo sapiens taste receptor
A_32_P97862	TEX38	1.65372	0.0194449	24696	NM_001145474	ref|Homo sapiens testis expressed 38 (TEX38)
A_33_P3324505	THC2492293	-1.52739	0.0462101	41256	THC2492293	Unknown
A_33_P3348086	THC2496594	2.18748	0.0445537	6980	THC2496594	tc|ENK5_HUMAN (Q902F9) HERV-K_19p13.11 provirus ancestral Env polyprotein precursor (Envelope polyprotein) (HERV-K113 envelope protein) (EnvK5 protein) [Contains: Surface protein (SU); Transmembrane protein (TM)]
A_33_P3209176	THC2506066	1.52813	0.020375	6474	THC2506066	Unknown
A_33_P3399765	THC2511093	1.59502	0.0318121	10013	THC2511093	tc|COEA1_HUMAN (Q05707) Collagen alpha-1(XIV) chain precursor (Undulin)
A_33_P3243230	THC2544321	-3.88968	0.0195332	38434	THC2544321	tc|HSINTLK8M interleukin 8 {Homo sapiens} (exp=-1; wgp=0; cg=0)
A_33_P3321993	THC2550350	1.91034	0.0224183	49472	THC2550350	Unknown
A_33_P3408237	THC2560329	1.88513	0.0479184	7395	THC2560329	tc|Q71V99_HUMAN (Q71V99) Cyclophilin
A_21_P0014898	THC2577566	-1.97662	0.0285557	31310	THC2577566	Unknown
A_21_P0014472	THC2757892	1.55172	0.0181752	62921	THC2757892	tc|ALU1_HUMAN (P39188) Alu subfamily J sequence contamination warning entry
A_19_P00804020	TLE1	-1.89576	0.0494875	7342	NM_001303104	ref|Homo sapiens transducin-like enhancer of split 1 (E(sp1) homolog
A_23_P11629	TMEM61	-1.9229	0.0394816	40148	NM_182532	ref|Homo sapiens transmembrane protein 61 (TMEM61)
A_21_P0006781	TNKS2-AS1	-1.52867	0.0392184	12532	NR_108070	ref|Homo sapiens TNKS2 antisense RNA 1 (head to head) (TNKS2-AS1)
A_23_P372331	TRNT1	1.54601	0.0460712	46923	NM_182916	ref|Homo sapiens tRNA nucleotidyl transferase
A_21_P0011021	TSSC2	1.68144	0.0319581	41692	NR_024248	ref|Homo sapiens tumor suppressing subtransferable candidate 2 pseudogene (TSSC2)
A_33_P3355371	TTC9C	1.69444	0.0233778	51783	ENST00000294161	ens|tetratricopeptide repeat domain 9C [Source:HGNC Symbol;Acc:HGNC:28432] [ENST00000294161]
A_33_P3263906	TUBE1	1.91255	0.0208529	58809	ENST00000368657	ens|tubulin
A_23_P115482	UBE2T	1.50148	0.0195947	12439	NM_014176	ref|Homo sapiens ubiquitin-conjugating enzyme E2T (UBE2T)
A_23_P208880	UHRF1	1.74228	0.0434163	33136	NM_013282	ref|Homo sapiens ubiquitin-like with PHD and ring finger domains 1 (UHRF1)
A_33_P3335840	WDR33	1.51248	0.0310725	4571	NM_001006623	ref|Homo sapiens WD repeat domain 33 (WDR33)
A_33_P3510335	WNK1	1.68339	0.037055	23718	NM_213655	ref|Homo sapiens WNK lysine deficient protein kinase 1 (WNK1)
A_21_P0010562	XLOC_l2_000427	2.23017	0.0127369	47349	TCONS_l2_00000598	linc|BROAD Institute lincRNA (XLOC_l2_000427)
A_33_P3390673	XLOC_l2_001559	1.57507	0.0460984	51693	TCONS_l2_00002992	linc|BROAD Institute lincRNA (XLOC_l2_001559)
A_21_P0011358	XLOC_l2_004854	1.6268	0.0428619	26765	TCONS_l2_00008962	linc|BROAD Institute lincRNA (XLOC_l2_004854)
A_21_P0011425	XLOC_l2_005179	-2.8554	0.0274627	38763	TCONS_l2_00009674	linc|BROAD Institute lincRNA (XLOC_l2_005179)
A_21_P0011768	XLOC_l2_006648	2.8814	0.0102645	55219	TCONS_l2_00012388	linc|BROAD Institute lincRNA (XLOC_l2_006648)
A_21_P0012393	XLOC_l2_009883	1.84616	0.0186672	6765	TCONS_l2_00018854	linc|BROAD Institute lincRNA (XLOC_l2_009883)
A_21_P0012461	XLOC_l2_010348	1.76525	0.0128324	49928	TCONS_l2_00019530	linc|BROAD Institute lincRNA (XLOC_l2_010348)
A_21_P0012709	XLOC_l2_011424	1.73553	0.0343988	6601	TCONS_l2_00021497	linc|BROAD Institute lincRNA (XLOC_l2_011424)
A_21_P0013325	XLOC_l2_013873	1.79855	0.0385986	42999	TCONS_l2_00026658	linc|BROAD Institute lincRNA (XLOC_l2_013873)
A_21_P0013337	XLOC_l2_013931	2.13222	0.0157631	11199	TCONS_l2_00026766	linc|BROAD Institute lincRNA (XLOC_l2_013931)
A_21_P0013497	XLOC_l2_014245	-1.88304	0.0345888	33601	TCONS_l2_00027829	linc|BROAD Institute lincRNA (XLOC_l2_014245)
A_19_P00315603	XLOC_l2_015760	1.64586	0.0165627	27418	TCONS_l2_00030536	linc|BROAD Institute lincRNA (XLOC_l2_015760)
A_21_P0014137	XR_112627	-2.82245	0.0473741	35556	XR_112627	gb|PREDICTED: Homo sapiens uncharacterized LOC100506048
A_33_P3291154	ZBTB20	1.60375	0.0195332	23335	NM_001164343	ref|Homo sapiens zinc finger and BTB domain containing 20 (ZBTB20)
A_21_P0000040	ZBTB24	-2.33053	0.0169649	18333	NM_001164313	ref|Homo sapiens zinc finger and BTB domain containing 24 (ZBTB24)
A_24_P325046	ZCCHC7	-1.7853	0.0397378	7327	ENST00000322831	ens|zinc finger
A_23_P336992	ZFAND2A	-1.57087	0.0315217	23189	NM_182491	ref|Homo sapiens zinc finger
A_23_P369666	ZMYND8	2.13635	0.00677362	39035	ENST00000468376	ens|zinc finger
A_33_P3388822	ZNF233	1.78788	0.0391183	53509	NM_181756	ref|Homo sapiens zinc finger protein 233 (ZNF233)
A_23_P153286	ZNF234	1.72677	0.0165627	15097	NM_006630	ref|Homo sapiens zinc finger protein 234 (ZNF234)
A_33_P3352822	ZNF547	1.90391	0.0297664	50689	ENST00000282282	ens|zinc finger protein 547 [Source:HGNC Symbol;Acc:HGNC:26432] [ENST00000282282]
A_33_P3239790	ZNF646	1.6924	0.030204	49296	NM_014699	ref|Homo sapiens zinc finger protein 646 (ZNF646)
A_33_P3211054	ZNF684	-1.56286	0.0463951	3090	NM_152373	ref|Homo sapiens zinc finger protein 684 (ZNF684)
A_33_P3312638	ZNF780B	1.78012	0.049509	17368	NM_001005851	ref|Homo sapiens zinc finger protein 780B (ZNF780B)
A_23_P502627	ZXDA	-1.81996	0.00953741	11317	NM_007156	ref|Homo sapiens zinc finger
